# Supplementary material for: Co-catalytic pyrolysis of biomass and waste triglyceride seed oil in a novel fluidized bed reactor to produce olefins and aromatics integrated with self-heating and catalyst regeneration processes
Source: Royal Society of Chemistry journal article supplement (doi:10.1039/c3ra40694f), 2013-01-01
Supplement: c3ra40694f.pdf [file c3ra40694f.pdf]

## Supplementary Online Materials

### Co-catalytic pyrolysis of biomass and waste triglyceride seed oil waste oil in a novel reactor to produce olefins and aromatics integrated with self-heating and catalyst regeneration processes

Huiyan Zhang,<sup>a</sup> Jian Zheng,<sup>a</sup> Rui Xiao,\*<sup>a</sup> Dekui Shen,<sup>a</sup> Baosheng Jin,<sup>a</sup> Guomin Xiao<sup>b</sup> and Ran Chen<sup>a</sup>

<sup>a</sup>Ministry of Education of Key Laboratory of Energy Thermal Conversion and Control, School of Energy and Environment, Southeast University, Nanjing 210096, P.R. China. E-mail: ruixiao@seu.edu.cn; Tel: (86)-025-83795726

<sup>b</sup>School of Chemistry and Chemical Engineering, Southeast University, Nanjing 210096, P.R. China.

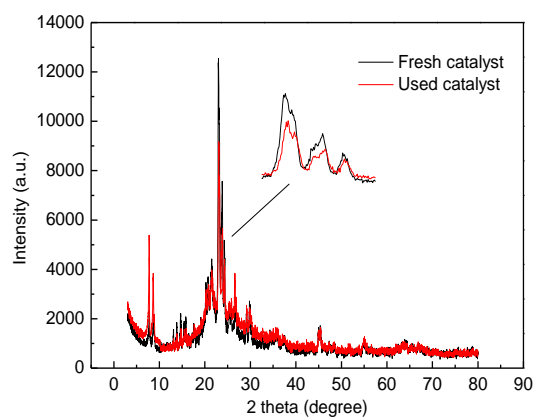

**Fig. S1** X-Ray diffraction (XRD) patterns before reaction (black line) and after reaction (red line)

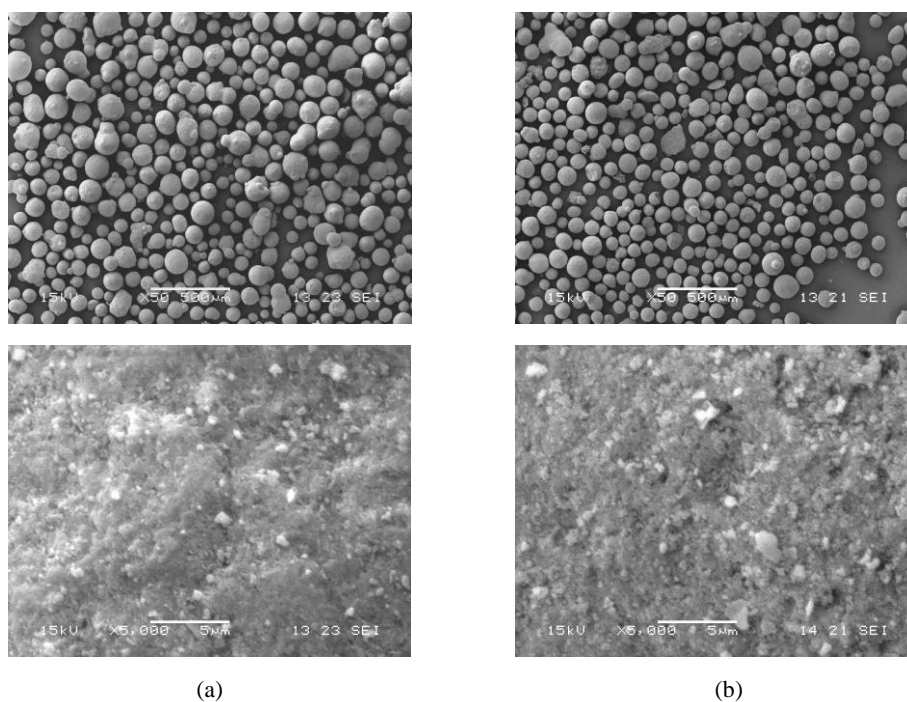

**Fig. S2** SEM images of the catalysts: (a) before reaction; (b) after reaction

## Experimental

According to cold experimental results of the IIFB reactor, when the ratio of height of bed materials to diameter of bed ( $H_0/D_t$ ) is 3, the operating range of spout-fluidized bed flow pattern was very wide, which is beneficial to the stability of biomass catalytic pyrolysis and char combustion processes.<sup>1</sup> In this work, we used  $H_0/D_t=3$ , which means that the volume of bed materials is about 360 mL.

**Table S1** Main characteristics of the rice stalk (air-dry basis)

|            | Proximate analysis (wt.%) |          |       |          | Ultimate analysis (wt.%) |      |                |      |
|------------|---------------------------|----------|-------|----------|--------------------------|------|----------------|------|
|            | Fixed carbon              | Volatile | Ash   | Moisture | C                        | H    | O <sup>a</sup> | N    |
| Rice stalk | 16.25                     | 66.26    | 14.54 | 2.95     | 35.36                    | 4.78 | 44.36          | 0.96 |
| Waste oil  | -                         | -        | -     | -        | 79.6                     | 11.9 | 8.5            | -    |

<sup>a</sup> By difference.

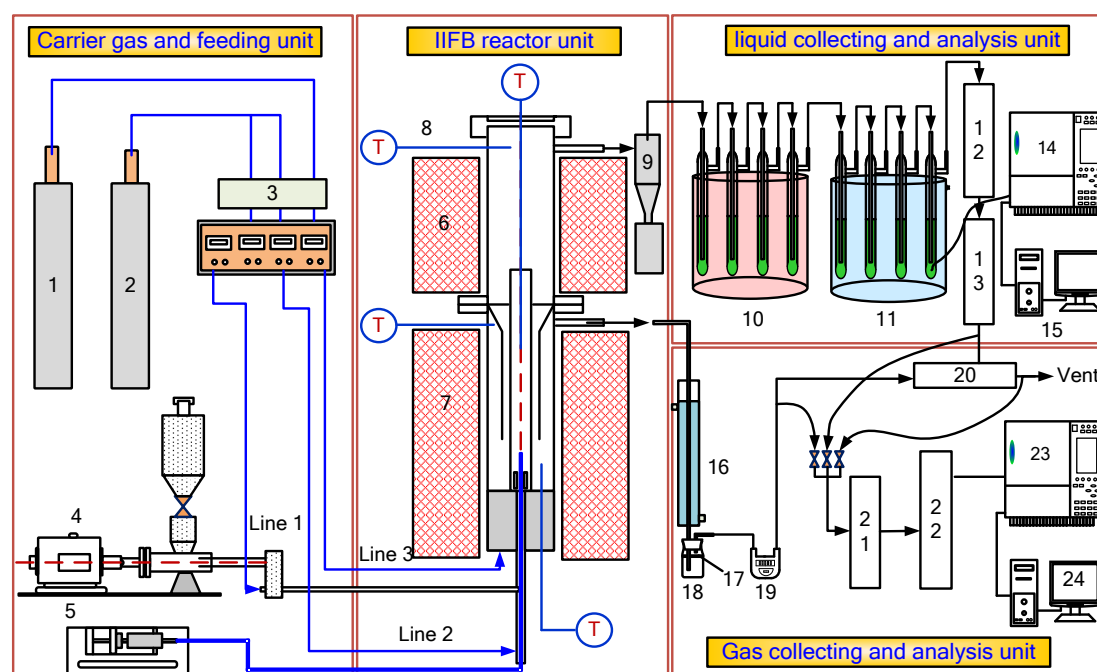

**Fig. S3** The experimental setup of internally interconnected fluidized bed reactor system: 1. O<sub>2</sub>; 2. N<sub>2</sub>; 3. Mass flow controller; 4. Auger feeder; 5. Feeding pump; 6,7. Heater; 8. Temperature controller; 9. Cyclone; 10. Ice condenser; 11. Dry ice condenser; 12,21. Cotton wool filter; 13,22. Silica gel filter; 14.GC/MS; 15,24. Data collecting computer; 16. Condenser; 17. Fine particle filter; 18. Particle container; 19. Accumulative flowmeter; 20. Gas mixer; 23. GC/FID/TCD

1. H. Y. Zhang, R. Xiao, Q. W. Pan, Q. L. Song and H. Huang, *Chem Eng Technol*, 2009, **32**, 27-37.
